# Supplementary material for: Multiple kinases inhibit origin licensing and helicase activation to ensure reductive cell division during meiosis
Source: eLife journal article supplement (doi:10.7554/elife.33309), 2018-02-01
Supplement: supp [file elife-33309-supp-v1.zip]

Archive with 8 entries (8 files):
- elife_poa_e33309_Figure_6_figure_supplement_3_source_data_1.xlsx
- elife_poa_e33309_Figure_6_source_data_1.xlsx
- elife_poa_e33309_Figure_1_source_data_1.xlsx
- elife_poa_e33309_Supplementary_File_1.xlsx
- elife_poa_e33309_Figure_4_source_data_1.xlsx
- elife_poa_e33309_Transparent_Reporting_File.pdf
- elife_poa_e33309_Figure_5_figure_supplement_2_source_data_1.xlsx
- elife_poa_e33309_Figure_5_source_data_1.xlsx
