# Supplementary material for: Multiple kinases inhibit origin licensing and helicase activation to ensure reductive cell division during meiosis
Source: eLife journal article supplement (doi:10.7554/elife.33309), 2018-02-01
Supplement: supp [file elife-33309-supp-v1.zip › elife_poa_e33309_Figure_1_source_data_1.xlsx]

## Sheet: Sheet1
Time	ORC ChIP ARS1			ORC ChIP ARS1413			ORC ChIP ARS305			ORC ChIP ARS418
0 hrs	0.374428	0.396457	0.346948	0.980629	1.48703	0.534495	0.0257961	0.0263755	0.0214372	0.13877	0.220079	0.129201
6 hrs	0.333163	0.405671	0.373519	0.267788	0.426638	0.242597	0.488771	0.601364	0.447219	0.584586	0.530316	0.510046
7 hrs	0.451846	0.219032	0.250287	0.328132	0.508226	0.364769	0.380219	0.59287	0.369123	0.543318	0.634973	0.57978
7 hrs 15 min	0.300079	0.336427	0.327986	0.616991	0.751778	0.657447	0.658968	1.11471	0.873073	0.811231	0.894247	1.13718
7 hrs 30 min	0.805808	0.746669	0.741941	0.652437	0.566559	0.695217	0.668868	0.787191	0.482905	0.927349	0.748436	0.874693
7 hrs 45 min	0.392938	0.432218	0.39045	0.928906	0.578948	0.700463	0.82226	0.96058	1.21738	1.17149	0.846634	0.983051
8 hrs	0.493052	0.394767	0.392267	0.612221	0.370951	0.502456	0.379942	0.467465	0.94453	0.694088	0.917725	0.717
8 hrs 15 min	0.483964	0.578168	0.493275	0.788068	0.718991	0.81063	0.750877	0.951618	0.61029	0.731889	0.646917	0.722443
8 hrs 30 min	0.951553	1.06006	0.988518	0.661003	0.542491	0.383906	0.974693	0.974693	0.885253	0.714026	0.856443	0.686734
8 hrs 45 min	0.227453	0.245468	0.228902	0.517013	0.427322	0.458566	0.578859	0.40874	0.433681	0.768807	0.624524	0.589063
9 hrs	0.563987	0.481175	0.451562	0.434092	0.404516	0.382312	0.18859	0.230322	0.192825	0.547223	0.490015	0.631282
9 hrs 30 min	0.137211	0.131244	0.128767	0.442272	0.656615	0.590665	0.37336	0.319598	0.269556	0.57153	0.579003	0.508468
10 hrs 30 min	0.0598395	0.0737943	0.100738	0.132034	0.142691	0.0981678	0.0776929	0.149053	0.102936	0.362167	0.451668	0.374123
	ORC ChIP ARS1			ORC ChIP ARS1413			ORC ChIP ARS305			ORC ChIP ARS418
	Mean	SD	N	Mean	SD	N	Mean	SD	N	Mean	SD	N
0 hrs	0.372611	0.0248042	3	1.00072	0.476585	3	0.0245363	0.00269945	3	0.162683	0.0499356	3
6 hrs	0.370784	0.0363313	3	0.312341	0.099782	3	0.512451	0.0797544	3	0.54165	0.0385403	3
7 hrs	0.307055	0.126363	3	0.400376	0.0951809	3	0.447404	0.126099	3	0.586024	0.0461453	3
7 hrs 15 min	0.321497	0.019023	3	0.675405	0.0691646	3	0.882249	0.228007	3	0.947553	0.169388	3
7 hrs 30 min	0.764806	0.0355873	3	0.638071	0.065521	3	0.646321	0.153391	3	0.850159	0.0919453	3
7 hrs 45 min	0.405202	0.0234299	3	0.736106	0.177681	3	1.00007	0.2005	3	1.00039	0.163122	3
8 hrs	0.426695	0.0574799	3	0.495209	0.120798	3	0.597312	0.303867	3	0.776271	0.123037	3
8 hrs 15 min	0.518469	0.0519104	3	0.772563	0.0477467	3	0.770928	0.171545	3	0.700416	0.0465718	3
8 hrs 30 min	1.00004	0.0551628	3	0.529133	0.139031	3	0.94488	0.0516385	3	0.752401	0.0911304	3
8 hrs 45 min	0.233941	0.0100089	3	0.467634	0.0455277	3	0.47376	0.0918685	3	0.660798	0.0952042	3
9 hrs	0.498908	0.0582724	3	0.406973	0.0259774	3	0.203912	0.022969	3	0.556173	0.0710576	3
9 hrs 30 min	0.132408	0.00434082	3	0.563184	0.109782	3	0.320838	0.0519132	3	0.553	0.0387469	3
10 hrs 30 min	0.0781241	0.0207904	3	0.124297	0.0232479	3	0.109894	0.0361851	3	0.395986	0.048591	3
Time	Mcm2-7 ChIP ARS1			Mcm2-7 ChIP ARS1413			Mcm2-7 ChIP ARS305			Mcm2-7 ChIP ARS418
0 hrs	1.42706	0.871719	0.701218	1.23305	0.655863	1.11111	1.13703	0.894211	0.968762	1.20625	0.794799	0.999112
6 hrs	0.00471769	0.0032131	0.00396887	0.00464242	0.00379423	0.00440689	0.000865658	0.000675855	0.000700908	0.00117731	0.00107146	0.00123408
6 hrs 45 min	0.00763558	0.00516721	0.0063419	0.00651649	0.0111843	0.00634904	0.00114714	0.0012795	0.00156879	0.00209683	0.00160203	0.00235094
7 hrs	0.00219128	0.00299863	0.00202926	0.00276948	0.00259498	0.00205296	0.000378983	0.000300227	0.000471483	0.000664044	0.000696069	0.000497209
7 hrs 10 min	0.0111842	0.00888226	0.00817301	0.0140856	0.0165744	0.0198874	0.00268079	0.00251078	0.00204779	0.00517721	0.00387649	0.0057657
7 hrs 20 min	0.00904903	0.00946374	0.00806418	0.0181037	0.0163134	0.0134199	0.00187804	0.00165943	0.00169607	0.00293448	0.00419191	0.00311768
7 hrs 30 min	0.00582168	0.00168155	0.00174739	0.00195716	0.00304667	0.00367953	0.00106123	0.000917444	0.000904183	0.00214773	0.00166316	0.00161899
7 hrs 40 min	0.00352396	0.00476097	0.00380533	0.0057771	0.00662317	0.00428246	0.00128643	0.00123145	0.00182449	0.00280083	0.00260101	0.00200066
7 hrs 50 min	0.00653416	0.00941142	0.00549702	0.013806	0.0168923	0.0144495	0.00230581	0.00192213	0.00180024	0.00485363	0.00435823	0.00402015
8 hrs	0.00541049	0.00880083	0.00611024	0.00514677	0.00780598	0.00894918	0.00107824	0.0011182	0.00131243	0.00203546	0.00244098	0.00147365
8 hrs 10 min	0.00475858	0.00405485	0.00460868	0.00936624	0.00838524	0.00967604	0.00104451	0.00154753	0.00109912	0.00217614	0.00176643	0.00176643
8 hrs 20 min	0.00622302	0.00851581	0.00540554	0.010995	0.00825715	0.00815037	0.00152995	0.00106316	0.00203225	0.0030249	0.0030249	0.00213183
8 hrs 30 min	0.00648956	0.00822392	0.0103553	0.0107768	0.0118049	0.00915862	0.000811692	0.00112632	0.00138097	0.00240871	0.00190329	0.00149384
8 hrs 40 min	0.00872648	0.009244	0.010918	0.0157569	0.0162781	0.0158598	0.00151147	0.00197869	0.00155613	0.00254486	0.00333084	0.00272199
8 hrs 50 min	0.0119171	0.00977208	0.0102856	0.015444	0.0178214	0.0125404	0.0015081	0.0012943	0.00212335	0.00269835	0.00279068	0.00304578
9 hrs	0.00697696	0.00813558	0.0078793	0.0107904	0.0129473	0.00905159	0.0013314	0.00210614	0.00128381	0.00302287	0.00183727	0.00203238
9 hrs 30 min	0.0222502	0.0246499	0.0302536	0.0130949	0.0174368	0.0160222	0.00620785	0.0053278	0.0051749	0.00844407	0.00934084	0.00850108
10 hrs	0.0171192	0.0269693	0.022257	0.0169497	0.0190563	0.0227171	0.00720802	0.0100751	0.0113196	0.0134768	0.0102276	0.0134768
	Mcm2-7 ChIP ARS1			Mcm2-7 ChIP ARS1413			Mcm2-7 ChIP ARS305			Mcm2-7 ChIP ARS418
Time	Mean	Std. Dev.	N	Mean	Std. Dev.	N	Mean	Std. Dev.	N	Mean	Std. Dev.	N
0 hrs	1	0.379546	3	1.00001	0.304209	3	1	0.124386	3	1.00005	0.205728	3
6 hrs	0.00396655	0.0007523	3	0.00428118	0.000437843	3	0.000747474	0.000103114	3	0.00116095	8.25348e-05	3
6 hrs 45 min	0.00638156	0.00123466	3	0.00801662	0.00274459	3	0.00133181	0.000215635	3	0.0020166	0.000380843	3
7 hrs	0.00240639	0.000519253	3	0.00247248	0.000373637	3	0.000383564	8.57199e-05	3	0.000619107	0.000106775	3
7 hrs 10 min	0.00941317	0.00157425	3	0.0168491	0.00291063	3	0.00241312	0.000327606	3	0.0049398	0.000966725	3
7 hrs 20 min	0.00885898	0.000718872	3	0.0159457	0.00236344	3	0.00174451	0.000117081	3	0.00341469	0.000679294	3
7 hrs 30 min	0.00308354	0.00237153	3	0.00289446	0.000871217	3	0.000960953	8.70975e-05	3	0.00180996	0.00029335	3
7 hrs 40 min	0.00403009	0.00064841	3	0.00556091	0.00118524	3	0.00144746	0.000327674	3	0.0024675	0.000416458	3
7 hrs 50 min	0.00714753	0.00202801	3	0.0150493	0.00162821	3	0.00200939	0.000263837	3	0.00441067	0.000419203	3
8 hrs	0.00677385	0.00178994	3	0.00730064	0.00195093	3	0.00116962	0.000125277	3	0.00198336	0.000485765	3
8 hrs 10 min	0.00447404	0.000370682	3	0.00914251	0.000673856	3	0.00123039	0.000276006	3	0.001903	0.000236546	3
8 hrs 20 min	0.00671479	0.0016124	3	0.00913417	0.0016124	3	0.00154179	0.000484654	3	0.00272721	0.000515612	3
8 hrs 30 min	0.00835626	0.00193626	3	0.0105801	0.00133406	3	0.00110633	0.000285166	3	0.00193528	0.000458274	3
8 hrs 40 min	0.00962949	0.00114548	3	0.0159649	0.00027604	3	0.0016821	0.000257825	3	0.0028659	0.000412281	3
8 hrs 50 min	0.0106582	0.00112001	3	0.0152686	0.00264484	3	0.00164192	0.00043042	3	0.00284494	0.00017996	3
9 hrs	0.00766395	0.000608592	3	0.0109298	0.0019516	3	0.00157379	0.000461647	3	0.00229751	0.000635715	3
9 hrs 30 min	0.0257179	0.00410724	3	0.0155179	0.00221442	3	0.00557018	0.000557498	3	0.008762	0.000502102	3
10 hrs	0.0221152	0.00492659	3	0.0195744	0.00291838	3	0.00953424	0.00210849	3	0.0123937	0.00187593	3
