# Supplementary material for: Multiple kinases inhibit origin licensing and helicase activation to ensure reductive cell division during meiosis
Source: eLife journal article supplement (doi:10.7554/elife.33309), 2018-02-01
Supplement: supp [file elife-33309-supp-v1.zip › elife_poa_e33309_Figure_4_source_data_1.xlsx]

## Sheet: Sheet1
Figure 4B Independent Experiments
	Experiment 1	Experiment 2	Experiment 3
-Cdc6	0.00162547	-0.000167759	-0.0308841
Cdc6, ORC, Mcm2-7, Cdt1 - Ime2	0.696633	0.636531	0.610427
Cdc6, ORC, Mcm2-7, Cdt1 +Ime2	0.0571661	0.0109221	0.00721272
Cdc6 - Ime2	0.709026	0.740823	0.810415
Cdc6 + Ime2	0.646508	0.550984	0.736875
ORC - Ime2	0.803418	0.684125	0.939002
ORC + Ime2	0.443191	0.260452	0.437151
Mcm2-7 - Ime2	0.874142	0.738313	0.891788
Mcm2-7 + Ime2	0.106187	0.0460219	0.0787407
Cdt1 - Ime2	1	1	1
Cdt1 + Ime2	0.833211	0.748716	0.843674
	Mean	Std. Dev.	N
-Cdc6	-0.00980881	0.0182738	3
Cdc6, ORC, Mcm2-7, Cdt1 - Ime2	0.647864	0.0442062	3
Cdc6, ORC, Mcm2-7, Cdt1 +Ime2	0.0251003	0.0278317	3
Cdc6 - Ime2	0.753421	0.0518549	3
Cdc6 + Ime2	0.644789	0.0929573	3
ORC - Ime2	0.808848	0.127525	3
ORC + Ime2	0.380265	0.103805	3
Mcm2-7 - Ime2	0.834747	0.0839795	3
Mcm2-7 + Ime2	0.076983	0.0301208	3
Cdt1 - Ime2	1	0	3
Cdt1 + Ime2	0.808534	0.0520675	3
Figure 4C Source Data	Exp. 1	Exp. 2	Exp. 3	Mean	Std. Dev.	N
Cdc6, ORC, Mcm2-7, Cdt1 (+Ime2 / -Ime2)	0.0820606	0.0171587	0.0118159	0.0370117	0.0391048	3
Cdc6 (+Ime2 / -Ime2)	0.911825	0.743746	0.909257	0.854942	0.0963073	3
ORC (+Ime2 / -Ime2)	0.551633	0.380708	0.465548	0.465963	0.0854631	3
Mcm2-7 (+Ime2 / -Ime2)	0.121475	0.0623339	0.0882953	0.0907015	0.029644	3
Cdt1 (+Ime2 / -Ime2)	0.833211	0.748716	0.843674	0.808534	0.0520674	3
