# Supplementary material for: Multiple kinases inhibit origin licensing and helicase activation to ensure reductive cell division during meiosis
Source: eLife journal article supplement (doi:10.7554/elife.33309), 2018-02-01
Supplement: supp [file elife-33309-supp-v1.zip › elife_poa_e33309_Figure_5_figure_supplement_2_source_data_1.xlsx]

## Sheet: Sheet1
	ARS305 Mcm2-7 ChIP			ARS418 Mcm2-7 ChIP
G1 arrest	1.11337	1.05764	0.830253	0.785037	1.19554	1.01946
G2/M arrest	0.0249094	0.0276034	0.0297043	0.048599	0.0406565	0.0580932
+ 30' DMSO	0.0845938	0.0763376	0.0923777	0.17086	0.141126	0.134969
+ 30' PP1	0.750174	0.681942	0.702248	0.654469	0.711001	0.598604
	ARS305 Mcm2-7 ChIP			ARS418 Mcm2-7 ChIP
	Mean	Std. Dev.	N	Mean	Std. Dev.	N
G1 arrest	1.00042	0.149982	3	1.00001	0.205941	3
G2/M arrest	0.0274057	0.0024036	3	0.0491163	0.00872988	3
+ 30' DMSO	0.0844363	0.00802123	3	0.148985	0.019193	3
+ 30' PP1	0.711454	0.0350352	3	0.654691	0.0561985	3
