# Supplementary material for: Multiple kinases inhibit origin licensing and helicase activation to ensure reductive cell division during meiosis
Source: eLife journal article supplement (doi:10.7554/elife.33309), 2018-02-01
Supplement: supp [file elife-33309-supp-v1.zip › elife_poa_e33309_Figure_5_source_data_1.xlsx]

## Sheet: Sheet1
yDP71 (Fig. 5A)	ARS305 MCM IP			ARS418 MCM IP
G1 phase	1.60677	1.02133	1.2714	0.723383	0.815848	0.520467
64% Ana I	0.00310548	0.00369456	0.00332389	0.0087451	0.0101159	0.0120016
+ 15' PP1	0.00269482	0.00299534	0.00231705	0.00802322	0.00957933	0.00887853
+ 30' PP1	0.00453809	0.00408278	0.00417633	0.0108495	0.0157627	0.0133703
	ARS305 MCM IP			ARS418 MCM IP
	Mean	Std. Dev.	N	Mean	Std. Dev.	N
G1 phase	1.29983	0.293752	3	0.686566	0.151093	3
64% Ana I	0.00337464	0.000297804	3	0.0102875	0.00163504	3
+ 15' PP1	0.00266907	0.000339881	3	0.00882703	0.000779333	3
+ 30' PP1	0.00426573	0.000240458	3	0.0133275	0.00245688	3
yDP152 (Fig. 5B)	ARS305 MCM IP			ARS418 MCM IP
G1 phase	1.09442	1.05387	0.84659	0.939243	0.963332	0.838082
48% Ana I	0.00726194	0.00917752	0.00748466	0.0183763	0.0159871	0.014631
+ 15' PP1	0.0197799	0.0163768	0.0191913	0.0433931	0.0409897	0.0394619
+ 30' PP1	0.0276931	0.0281145	0.023454	0.0408301	0.0329228	0.0348532
	ARS305 MCM IP			ARS418 MCM IP
	Mean	Std. Dev.	N	Mean	Std. Dev.	N
G1 phase	0.998294	0.132935	3	0.913552	0.0664597	3
48% Ana I	0.00797471	0.0010476	3	0.0163315	0.00189623	3
+ 15' PP1	0.0184493	0.00181882	3	0.0412815	0.00198178	3
+ 30' PP1	0.0264205	0.00257774	3	0.036202	0.0041226	3
yDP176 (Fig. 5C)	ARS305 MCM IP			ARS418 MCM IP
G1 phase	0.964117	1.2558	1.23698	1.52605	1.3878	1.03717
70% Ana I	0.00510816	0.00635883	0.00580792	0.0144656	0.00964645	0.00882824
+ 15' PP1	0.0151936	0.0140884	0.0167609	0.0156974	0.0174811	0.0165129
+ 30' PP1	0.0266037	0.0242988	0.0246686	0.0277741	0.024163	0.0333715
	ARS305 MCM IP			ARS418 MCM IP
	Mean	Std. Dev.	N	Mean	Std. Dev.	N
G1 phase	1.1523	0.163242	3	1.31701	0.252014	3
70% Ana I	0.0057583	0.000626812	3	0.0109801	0.00304614	3
+ 15' PP1	0.0153476	0.00134287	3	0.0165638	0.000892954	3
+ 30' PP1	0.0251904	0.00123787	3	0.0284362	0.00463984	3
yDP177 (Fig. 5D)	ARS305 MCM IP			ARS418 MCM IP
G1 phase	0.44264	0.701644	0.507092	1.47503	0.996163	0.783157
49% Ana I	0.00426528	0.00233113	0.00398502	0.0145277	0.0169117	0.0163847
+ 15' PP1	0.0294828	0.0184597	0.0205182	0.0591835	0.0599377	0.0697731
+ 30' PP1	0.275781	0.251888	0.275781	0.279176	0.322936	0.22511
	ARS305 MCM IP			ARS418 MCM IP
	Mean	Std. Dev.	N	Mean	Std. Dev.	N
G1 phase	0.550459	0.134838	3	1.08478	0.354348	3
49% Ana I	0.00352714	0.00104521	3	0.0159414	0.00125227	3
+ 15' PP1	0.0228202	0.00586104	3	0.0629648	0.00590826	3
+ 30' PP1	0.267817	0.0137947	3	0.275741	0.0490036	3
