# Supplementary material for: Multiple kinases inhibit origin licensing and helicase activation to ensure reductive cell division during meiosis
Source: eLife journal article supplement (doi:10.7554/elife.33309), 2018-02-01
Supplement: supp [file elife-33309-supp-v1.zip › elife_poa_e33309_Figure_6_figure_supplement_3_source_data_1.xlsx]

## Sheet: Sheet1
Input (µL)	Sld2 Quantification	Pgk1 Quantification	Expected
1 µL	0.0266432	0.0249801	0.03125
2 µL	0.0810493	0.0437152	0.0625
4 µL	0.218698	0.121105	0.125
8 µL	0.486376	0.341488	0.25
16 µL	0.693375	0.536503	0.5
32 µL	1	1	1
