# Supplementary material for: Multiple kinases inhibit origin licensing and helicase activation to ensure reductive cell division during meiosis
Source: eLife journal article supplement (doi:10.7554/elife.33309), 2018-02-01
Supplement: supp [file elife-33309-supp-v1.zip › elife_poa_e33309_Figure_6_source_data_1.xlsx]

## Sheet: Sheet1
Sample	NormalizedSld2/Pgk1 Exp. 1	NormalizedSld2/Pgk1 Exp. 2	NormalizedSld2/Pgk1 Exp. 3	Mean	Standard Deviation
WT G2	0.650636	0.698065	0.916491	0.755064	0.141797
2TA G2	1.00001	1.00001	0.723207	0.907741	0.159811
2SA G2	0.945945	0.846036	0.667212	0.819731	0.141216
2TA / 2SA G2	0.928349	0.792457	1.00031	0.907037	0.10555
WT Meta I	0.0272729	0.05611	0.126981	0.0701214	0.0513097
2TA Meta I	0.517371	0.535346	0.434492	0.495736	0.0537953
2SA Meta I	0.702789	0.537189	0.572623	0.6042	0.0871988
2TA / 2SA Meta I	0.799008	0.558442	0.783025	0.713491	0.134514
WT Ana I	0.0317291	0.0674172	0.107015	0.0687204	0.0376598
2TA Ana I	0.486437	0.467868	0.550302	0.501536	0.0432416
2SA Ana I	0.685669	0.475083	0.537388	0.566047	0.108179
2TA / 2SA Ana I	0.780637	0.537031	0.714914	0.677528	0.126033
WT Meta II	0.0569666	0.0622325	0.132169	0.0837893	0.0419804
2TA Meta II	0.504702	0.31879	0.457975	0.427156	0.0967121
2SA Meta II	0.590306	0.377888	0.426869	0.465021	0.11123
2TA / 2SA Meta II	0.626696	0.390162	0.791653	0.602837	0.201806
WT Ana II	0.110422	0.0552171	0.206455	0.124031	0.0765322
2TA Ana II	0.612952	0.349652	0.53708	0.499895	0.135531
2SA Ana II	0.396919	0.29254	0.477006	0.388822	0.0924992
2TA / 2SA Ana II	0.479971	0.265562	0.669801	0.471778	0.202244
