# Supplementary material for: Multiple kinases inhibit origin licensing and helicase activation to ensure reductive cell division during meiosis
Source: eLife journal article supplement (doi:10.7554/elife.33309), 2018-02-01
Supplement: supp [file elife-33309-supp-v1.zip › elife_poa_e33309_Supplementary_File_1.xlsx]

## Sheet: Sheet1
Cdc6 Phosphopeptides	Residue(s)	Buffer #1	Buffer #2	Ime2 #1	Ime2 #2	Enrichment (Ime2 / Buffer)
GSLNSAQVPLTPTTSPVKK	T371	1	0.876346	15.3274	17.2956	17.3864
GSLNSAQVPLTPTTSPVKK	T370	1	0.91741	13.5465	14.1215	14.4299
GSLNSAQVPLTPTTSPVKK	S362, T368	1	1.02174	12.8111	15.345	13.9267
GSLNSAQVPLTPTTSPVK	S362	1	0.976738	7.2381	9.24622	8.33916
GSLNSAQVPLTPTTSPVK	T368	1	1.05132	7.29538	8.94967	7.91931
GSLNSAQVPLTPTTSPVKK	T368	1	0.959576	6.3692	7.61718	7.13745
GSLNSAQVPLTPTTSPVK	S362, T368	1	1.01484	6.47347	7.76651	7.06754
GSLNSAQVPLTPTTSPVK	T370	1	1.16549	6.57013	7.43015	6.46518
SDSLYITGPPGTGK	T107	1	1.00123	5.06687	5.5689	5.31462
SDSLYITGPPGTGK	T112	1	1.0109	4.98927	5.62701	5.27938
NLFDDAPATPPRPLKR	T23	1	1.16267	4.25012	4.53299	4.06124
SSELVNLNSSDGALPAR	S73	1	0.988959	2.18936	1.9436	2.07795
FLLSPTR	T356	1	0.902078	1.83175	1.07212	1.52668
LLHANTSETQSVR	T233	1	0.947211	0.980229	1.24912	1.1449
